# Supplementary material for: Adsorption characteristics and inhibition effect of two Schiff base compounds on corrosion of mild steel in 0.5 M HCl solution: experimental, DFT studies, and Monte Carlo simulation
Source: Royal Society of Chemistry journal article supplement (doi:10.1039/c9ra00397e), 2019-01-01
Supplement: c9ra00397e1.pdf [file c9ra00397e1.pdf]

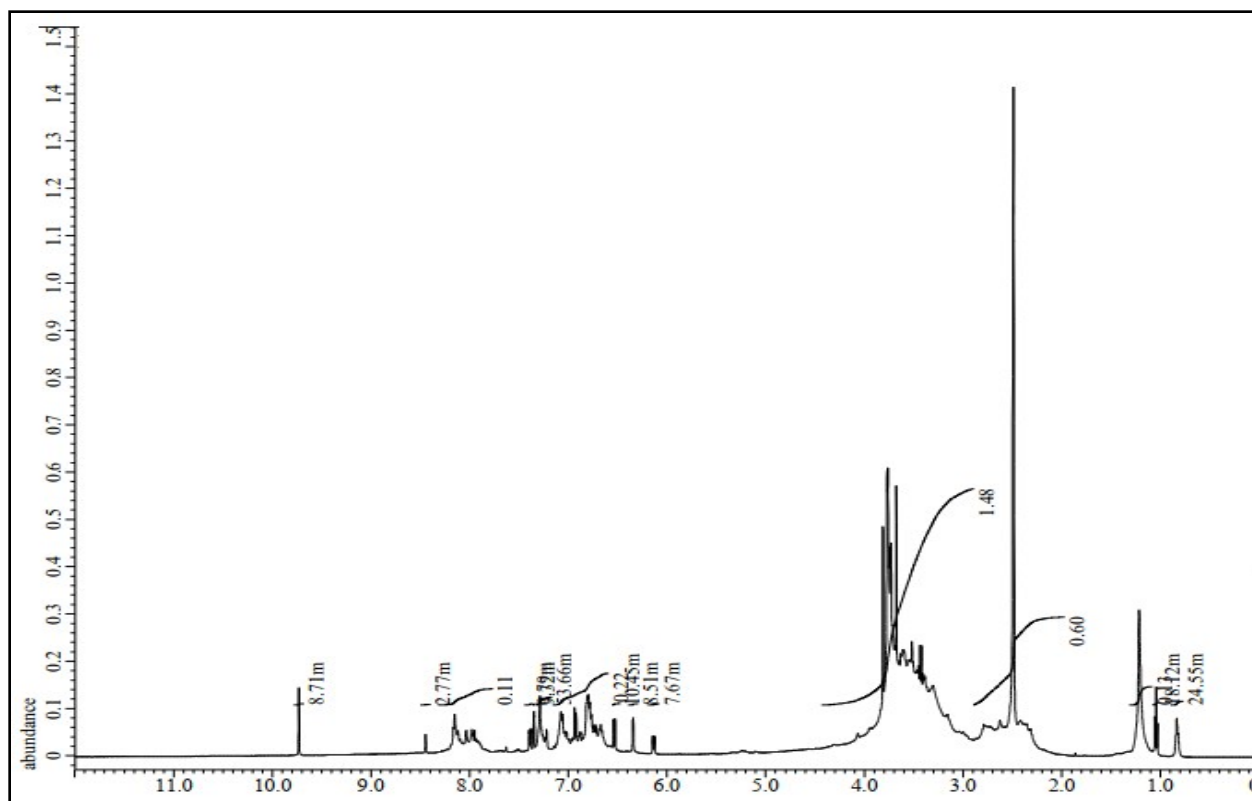

**Fig. S1-** <sup>1</sup>H NMR spectra of (VA) compound

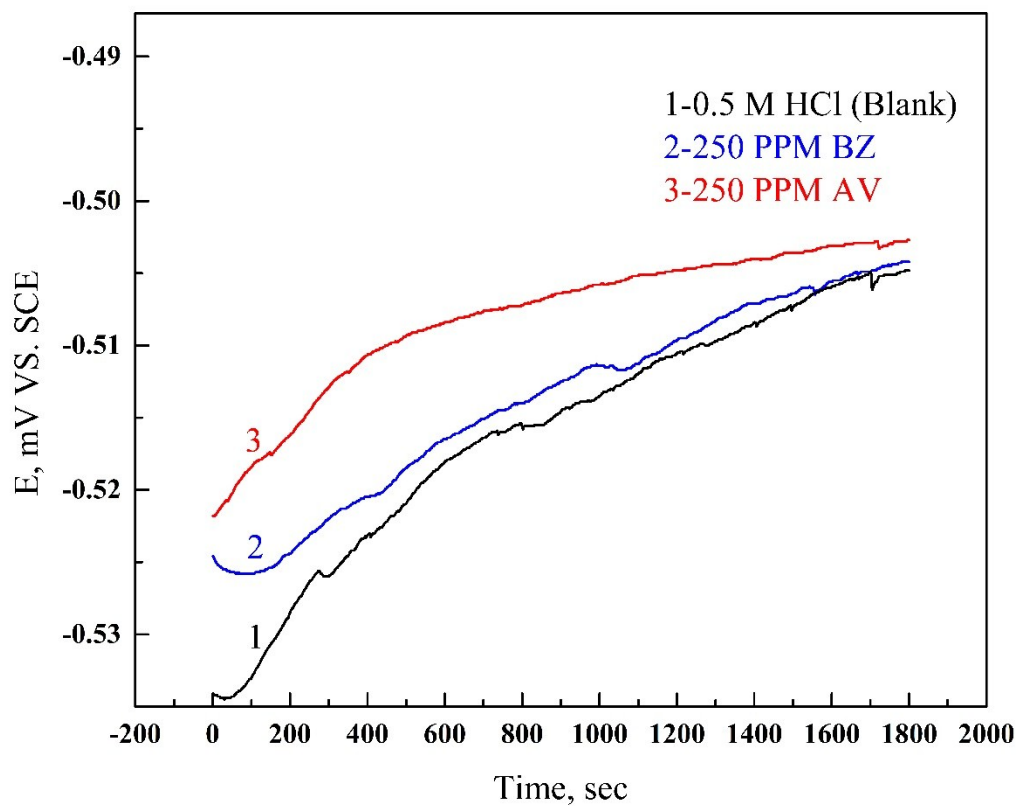

**Fig. S2.** The change for open circuit potential (E, mV) of mild steel with the time (sec.) in 0.5M HCl solution without (1) and with the optimum concentration (250 PPM) of BZ (2) and AV (3) respectively.

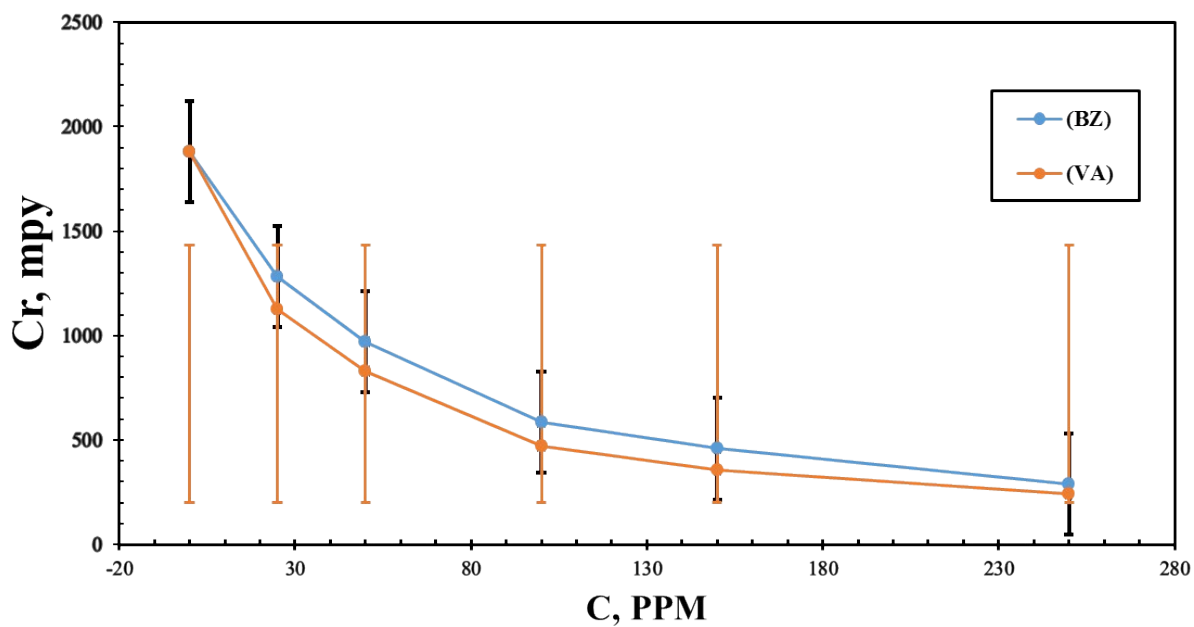

**Fig S3. Relation between corrosion rate (Cr, mpy) and concentration (C, PPM) with standard deviation error bar.**

**Table S1-Langmuir isotherm type for the adsorption of Bz and VA of the MS at 298 K**

| Inhibitor | Method         |                             |                               |                |                             |                               |                |                             |                               |
|-----------|----------------|-----------------------------|-------------------------------|----------------|-----------------------------|-------------------------------|----------------|-----------------------------|-------------------------------|
|           | Tafel          |                             |                               | EIS            |                             |                               | W1             |                             |                               |
|           | R <sup>2</sup> | K,<br>(L.mg <sup>-1</sup> ) | -ΔG<br>(kJmol <sup>-1</sup> ) | R <sup>2</sup> | K,<br>(L.mg <sup>-1</sup> ) | -ΔG<br>(kJmol <sup>-1</sup> ) | R <sup>2</sup> | K,<br>(L.mg <sup>-1</sup> ) | -ΔG<br>(kJmol <sup>-1</sup> ) |
| BZ        | 0.994          | 0.022684                    | 24.85                         | 0.994          | 0.016798                    | 24.10                         | 0.998          | 0.018767                    | 24.38                         |
| VA        | 0.998          | 0.030041                    | 25.54                         | 0.997          | 0.02128                     | 24.70                         | 0.999          | 0.02693                     | 25.27                         |
